# Supplementary material
Source: Springer Nature journal article supplement (https://www.springermedizin.de/resource/supplementary/13011_2007_76_MOESM1_ESM.pdf/9628392)

# CO levels for self reported smokers and non-smokers

self reported smoking

non smoker

smoker

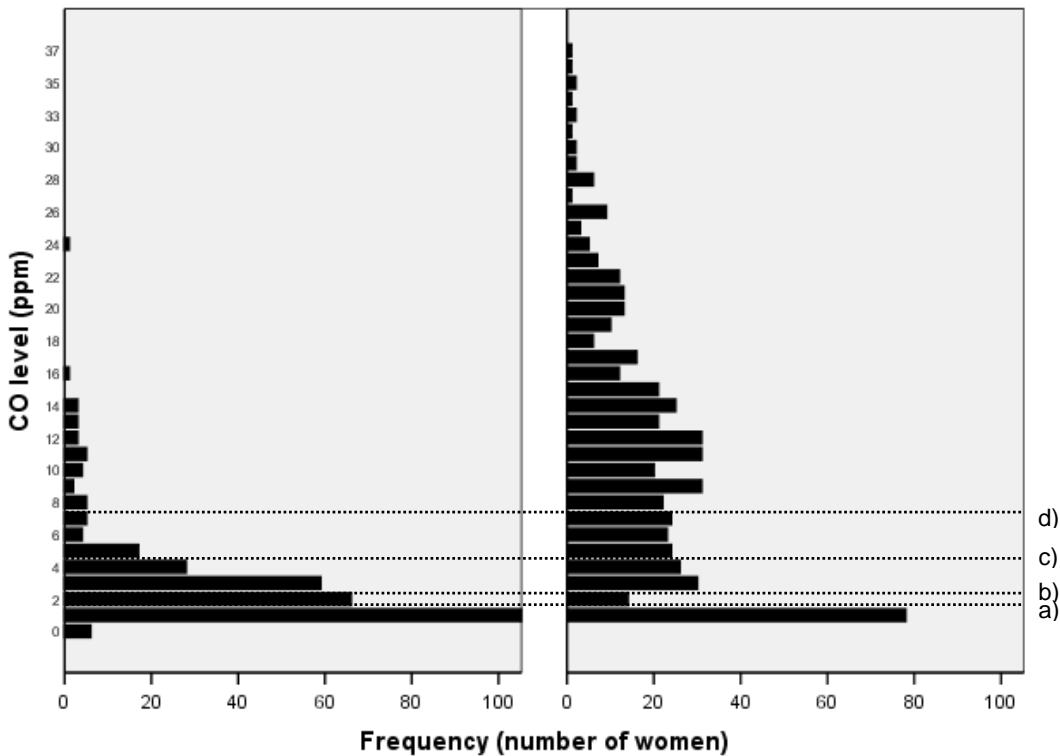

Supplement: MOESM1 [file 9628392]
